# Supplementary material for: High-throughput transcriptome sequencing reveals extremely high doses of ionizing radiation-response genes in Caenorhabditis elegans
Source: Royal Society of Chemistry journal article supplement (doi:10.1039/c9tx00101h), 2019-08-06
Supplement: c9tx00101h1.pdf [file c9tx00101h1.pdf]

**Supplementary Figure 1.** Gene coverage of the 6 samples. Sample 1: X-ray 0 Gy vs X-ray 200 Gy (A), sample 2: X-ray 0 Gy vs X-ray 200 Gy (B), sample 3: X-ray 0 Gy vs X-ray 400 Gy (C), sample 4: X-ray 0 Gy vs X-ray 400 Gy (D), sample 5: X-ray 200 Gy vs X-ray 400 Gy (E), sample 6: X-ray 200 Gy vs X-ray 400 Gy (F).

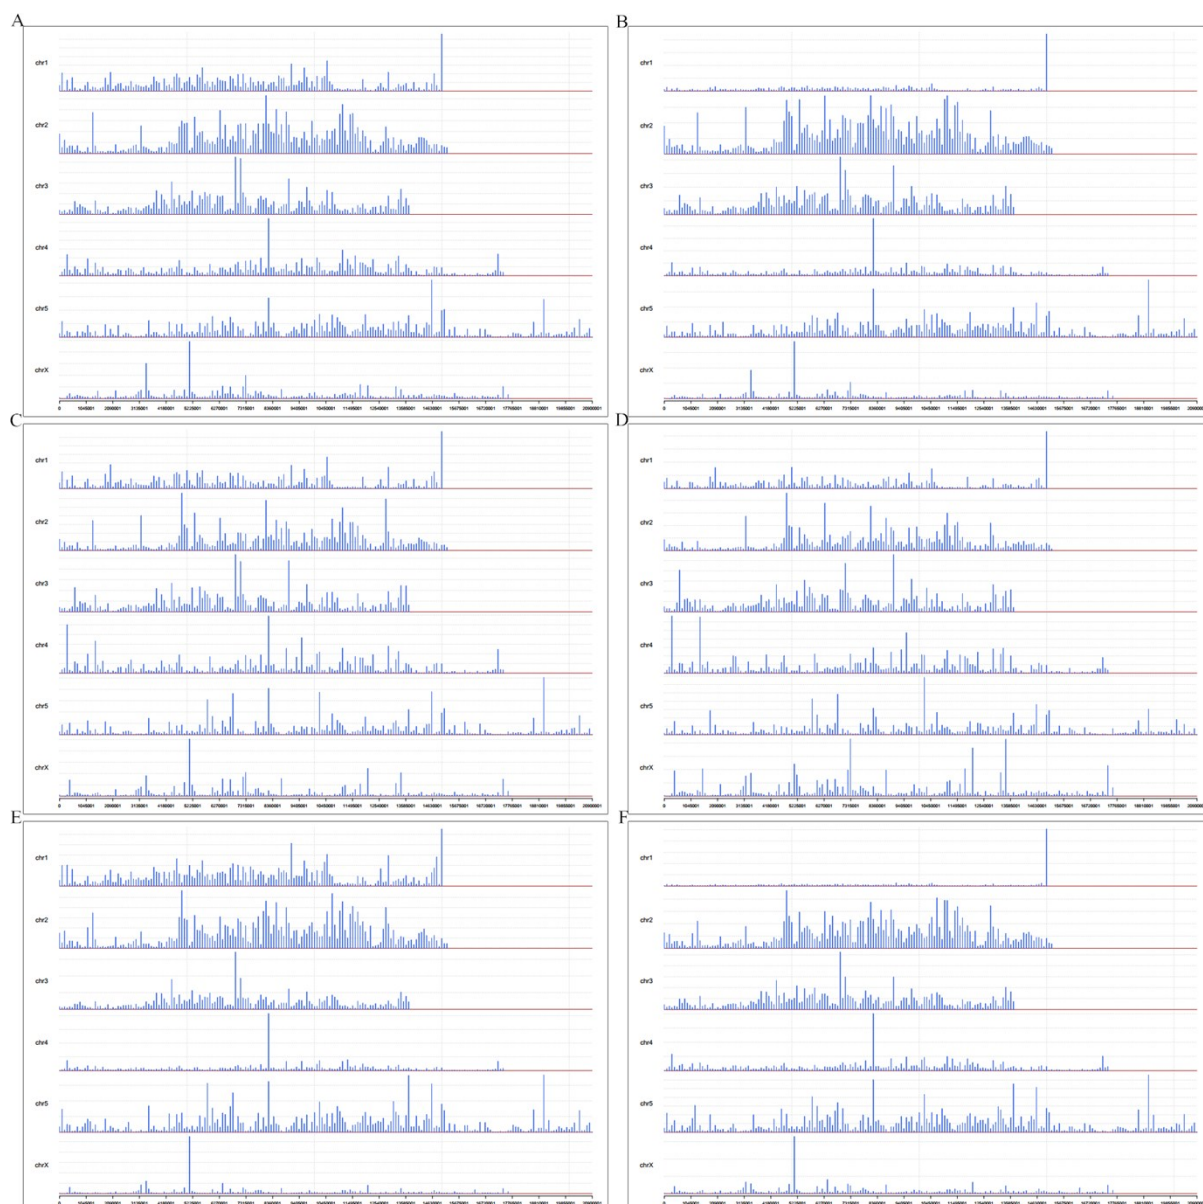

**Supplementary Table 1.** Summary of RNA-seq and alignment results

| <b>Sample</b>          | <b>0 Gy</b>            | <b>0 Gy</b>            | <b>200 Gy</b>          | <b>200 Gy</b>          | <b>400 Gy</b>          | <b>400 Gy</b>          |
|------------------------|------------------------|------------------------|------------------------|------------------------|------------------------|------------------------|
| <b>Effective reads</b> | 13,738,981             | 13,493,221             | 12,744,402             | 15,802,155             | 15,686,168             | 14,110,262             |
| <b>Total mapped</b>    | 13,455,392<br>(97.94%) | 13,062,182<br>(96.81%) | 12,410,624<br>(97.38%) | 15,276,711<br>(96.67%) | 15,381,028<br>(98.05%) | 13,710,527<br>(97.17%) |
| <b>Multiple mapped</b> | 554,811<br>(4.04%)     | 739,162<br>(5.48%)     | 436,649<br>(3.43%)     | 703,751<br>(4.45%)     | 592,837<br>(3.78%)     | 832,474<br>(5.9%)      |
| <b>Uniquely mapped</b> | 12,900,581<br>(93.9%)  | 12,323,020<br>(91.33%) | 11,973,975<br>(93.95%) | 14,572,960<br>(92.22%) | 14,788,191<br>(94.28%) | 12,878,053<br>(91.27%) |

**Supplementary Table 2.** Intersection of differentially expressed genes in all comparisons

| Gene            | Description                                            | Log2 Fold Change |             |                  |
|-----------------|--------------------------------------------------------|------------------|-------------|------------------|
|                 |                                                        | 0 VS 200 Gy      | 0 VS 400 Gy | 200 Gy VS 400 Gy |
| <b>chd-7</b>    | Chromodomain and helicase domain protein               | -3.3918          | 1.49903247  | 4.886157         |
| <b>folt-2</b>   | Folate-like transporter 2                              | 3.48088          | 1.79690085  | -1.6662          |
| <b>dpy-22</b>   | Mediator of RNA polymerase II transcription subunit 12 | -3.4252          | 2.15789259  | 5.588007         |
| <b>rig-4</b>    | Protein sidekick homolog                               | -2.9079          | 1.34252555  | 4.261393         |
| <b>fli-1</b>    | Protein flightless-1 homolog                           | -2.8954          | 1.22315761  | 4.130967         |
| <b>eea-1</b>    | EEA1 (Early Endosome Antigen, Rab effector) homolog    | -2.8662          | 1.39161318  | 4.263046         |
| <b>T08G11.1</b> | Hypothetical protein                                   | -2.7291          | 2.14463797  | 4.886249         |
| <b>C44E4.1</b>  | Protein coding                                         | -2.5922          | 1.68929885  | 4.294254         |
| <b>dcr-1</b>    | Endoribonuclease dcr-1                                 | -2.585           | 1.38921922  | 3.986044         |
| <b>ced-7</b>    | ABC transporter ced-7                                  | -2.533           | 1.40001495  | 3.940759         |
| <b>spat-3</b>   | Suppressor of Par-Two defect                           | -2.5587          | 1.92312767  | 4.483789         |
| <b>epg-5</b>    | Ectopic P granules protein 5                           | -2.8393          | 1.29747554  | 4.136039         |
| <b>smg-1</b>    | Serine/threonine-protein kinase smg-1                  | -2.3853          | 1.69006669  | 4.078294         |
| <b>ins-19</b>   | INSulin related                                        | -2.5826          | -6.1915871  | -3.59217         |
| <b>F39C12.1</b> | hypothetical protein                                   | -2.5261          | 2.49250531  | 5.025321         |
| <b>fasn-1</b>   | Fatty Acid SyNthase                                    | -2.1426          | 1.53333252  | 3.679828         |
| <b>F59E12.9</b> | Hypothetical protein                                   | -2.0524          | 1.5425462   | 3.593745         |
| <b>C25H3.8</b>  | Hypothetical protein                                   | -2.2193          | 2.03133348  | 4.261073         |

|                  |                                                        |         |            |          |
|------------------|--------------------------------------------------------|---------|------------|----------|
| <b>W06H8.6</b>   | Hypothetical protein                                   | -2.1931 | 1.27590273 | 3.459691 |
| <b>daf-2</b>     | Insulin-like receptor subunit<br>beta                  | -2.0034 | 1.72590186 | 3.71736  |
| <b>Y32H12A.8</b> | Hypothetical protein                                   | -2.2824 | 2.45992086 | 4.751367 |
| <b>sdc-3</b>     | Zinc finger protein sdc-3                              | -2.7231 | 1.99696131 | 4.724168 |
| <b>din-1</b>     | Daf-12-interacting protein 1                           | -1.9786 | 1.60116092 | 3.570732 |
| <b>gei-8</b>     | Nuclear receptor corepressor 1                         | -2.1312 | 1.70430126 | 3.829353 |
| <b>dpy-21</b>    | DumPY: shorter than wild-type                          | -1.8826 | 1.42717076 | 3.303257 |
| <b>hgap-2</b>    | Heterodimeric GTPase-<br>Activating Protein subunit    | -2.0038 | 1.42502164 | 3.435778 |
| <b>C52B9.8</b>   | Hypothetical protein                                   | -2.3575 | 1.5084498  | 3.876401 |
| <b>F36A2.13</b>  | Protein coding                                         | -1.7864 | 2.35973703 | 4.150931 |
| <b>C25H3.11</b>  | Hypothetical protein                                   | -2.7195 | 2.40093875 | 5.131261 |
| <b>lpd-3</b>     | Lipid Depleted                                         | -2.0721 | 2.53428647 | 4.615137 |
| <b>lin-59</b>    | Probable histone-lysine N-<br>methyltransferase lin-59 | -1.7833 | 1.29782023 | 3.071628 |
| <b>dnc-1</b>     | DyNactin Complex component                             | -1.8426 | 1.44054446 | 3.297867 |
| <b>F10G7.10</b>  | Hypothetical protein                                   | -1.7935 | 1.34795499 | 3.149539 |
| <b>Y47G6A.29</b> | Protein coding                                         | -2.0709 | 2.82030277 | 4.901031 |
| <b>pqn-15</b>    | Prion-like-(Q/N-rich)-domain-<br>bearing protein       | -2.5825 | 2.01167332 | 4.592746 |
| <b>agef-1</b>    | Arf-1 Guanine nucleotide<br>Exchange Factor homolog    | -1.7467 | 1.6788463  | 3.433445 |
| <b>mup-4</b>     | Transmembrane matrix<br>receptor MUP-4                 | -1.8065 | 1.86174584 | 3.671173 |
| <b>T24B8.7</b>   | Ubiquitin carboxyl-terminal<br>hydrolase               | -2.1786 | 2.37237082 | 4.561528 |
| <b>pld-1</b>     | Phospholipase D                                        | -1.6667 | 1.48525817 | 3.161935 |
| <b>let-765</b>   | Hypothetical protein                                   | -1.6633 | 1.88881297 | 3.543249 |

|                  |                                                                            |         |            |          |
|------------------|----------------------------------------------------------------------------|---------|------------|----------|
| <b>tin-13</b>    | Mitochondrial import inner<br>membrane translocase subunit<br>tim-13       | 1.69213 | -1.2150175 | -2.90297 |
| <b>gon-1</b>     | A disintegrin and<br>metalloproteinase with<br>thrombospondin motifs gon-1 | -2.3978 | 2.19918695 | 4.615009 |
| <b>C10C5.1</b>   | Piezo-type mechanosensitive<br>ion channel component                       | -1.6589 | 1.752036   | 3.415606 |
| <b>lrp-2</b>     | Low-density lipoprotein<br>Receptor related                                | -2.1673 | 2.07937629 | 4.264305 |
| <b>lam-2</b>     | Laminin-like protein lam-2                                                 | -1.7147 | 1.97711654 | 3.687911 |
| <b>pqn-85</b>    | Nipped-B-like protein pqn-85                                               | -1.8575 | 2.46712434 | 4.330448 |
| <b>ptrn-1</b>    | Patronin (microtubule-binding<br>protein) homolog                          | -1.8387 | 1.3741093  | 3.219412 |
| <b>cnc-2</b>     | Caenorhabditis bacteriocin                                                 | 1.73981 | -2.4090362 | -4.18844 |
| <b>C32E12.4</b>  | Hypothetical protein                                                       | -2.2448 | 1.71937269 | 3.952856 |
| <b>gtl-1</b>     | Gon-Two Like (TRP<br>subfamily)                                            | -1.7458 | 1.5735785  | 3.333688 |
| <b>Y105E8A.2</b> | Protein coding                                                             | -1.4986 | 1.52562931 | 3.017875 |
| <b>4</b>         |                                                                            |         |            |          |
| <b>par-1</b>     | Serine/threonine-protein kinase<br>par-1                                   | -1.4339 | 1.31443905 | 2.74722  |
| <b>lrk-1</b>     | Leucine-rich repeat<br>serine/threonine-protein kinase<br>1                | -1.712  | 1.41731415 | 3.140301 |
| <b>plc-1</b>     | 1-phosphatidylinositol 4,5-<br>bisphosphate<br>phosphodiesterase epsilon-1 | -2.3593 | 1.68265324 | 4.05058  |
| <b>Y105E8A.2</b> | Hypothetical protein                                                       | -1.7347 | 1.7282113  | 3.459838 |

---

| <b>5</b>        |                                                        |         |            |          |
|-----------------|--------------------------------------------------------|---------|------------|----------|
| <b>mig-38</b>   | Abnormal cell migration protein 38                     | -3.0595 | 1.67546539 | 4.740421 |
| <b>sma-1</b>    | SMAII                                                  | -2.9189 | 2.21857555 | 5.1482   |
| <b>let-716</b>  | Hypothetical protein                                   | -2.4973 | 1.4906533  | 3.994332 |
| <b>let-363</b>  | Target of rapamycin homolog                            | -2.5426 | 1.99168075 | 4.549131 |
| <b>let-19</b>   | Mediator of RNA polymerase II transcription subunit 13 | -2.8194 | 1.84495962 | 4.670756 |
| <b>F59A2.6</b>  | Protein coding                                         | -2.6239 | 1.77850603 | 4.407793 |
| <b>ced-5</b>    | Hypothetical protein                                   | -2.4744 | 1.46093196 | 3.946866 |
| <b>taf-1</b>    | Transcription initiation factor TFIID subunit 1        | -2.545  | 2.0787109  | 4.633003 |
| <b>F54B3.1</b>  | Hypothetical protein                                   | -2.4649 | 2.37575235 | 4.863045 |
| <b>tag-184</b>  | CRE-TAG-184 protein                                    | -2.6031 | 1.49882566 | 4.115382 |
| <b>met-1</b>    | Histone-lysine N-methyltransferase                     | -2.353  | 1.96466069 | 4.324936 |
| <b>wdfy-3</b>   | WD40 and FYVE domain protein                           | -2.7066 | 1.42191843 | 4.141387 |
| <b>let-418</b>  | Protein let-418                                        | -2.246  | 2.12036986 | 4.371435 |
| <b>attf-5</b>   | AT hook Transcription Factor family                    | -3.8207 | 1.44039984 | 5.26774  |
| <b>sql-1</b>    | Suppressor of gpa-3QL dye-filling defect               | -2.5929 | 1.63414622 | 4.233438 |
| <b>C56E6.9</b>  | Hypothetical protein                                   | -2.7692 | 1.35547099 | 4.142651 |
| <b>sma-9</b>    | SMAII                                                  | -2.4338 | 1.52605046 | 3.963811 |
| <b>lin-49</b>   | Protein lin-49                                         | -2.366  | 1.21585873 | 3.595214 |
| <b>T28C6.7</b>  | Hypothetical protein                                   | -2.3713 | 1.75726613 | 4.137627 |
| <b>F55F10.1</b> | Midasin                                                | -2.0752 | 3.07411922 | 5.151674 |
| <b>spr-4</b>    | Suppressor of presenilin                               | -2.1637 | 1.39648003 | 3.567622 |

---

|                 |                                                          |         |            |          |
|-----------------|----------------------------------------------------------|---------|------------|----------|
|                 | protein 4                                                |         |            |          |
| <b>ten-1</b>    | TENeurin                                                 | -2.0722 | 1.60165959 | 3.662898 |
| <b>unc-70</b>   | Hypothetical protein                                     | -2.2117 | 1.67293746 | 3.880096 |
| <b>lam-1</b>    | LAMinin related                                          | -2.0895 | 1.3663123  | 3.468014 |
| <b>C36C9.10</b> | ncRNA                                                    | 1.96842 | -2.2127163 | -4.19967 |
| <b>cbp-1</b>    | Protein cbp-1                                            | -1.7888 | 2.10094063 | 3.883003 |
| <b>F59A2.2</b>  | Hypothetical protein                                     | -2.3088 | 1.59175219 | 3.914786 |
| <b>wnk-1</b>    | Serine/threonine-protein kinase<br>WNK                   | -1.7465 | 2.13731956 | 3.885542 |
| <b>ebax-1</b>   | Elongin-B/C E3 ligase in Axon<br>guidance                | -2.1518 | 1.39923682 | 3.556779 |
| <b>mel-28</b>   | Hypothetical protein                                     | -2.2083 | 2.18402614 | 4.400261 |
| <b>nmy-1</b>    | Non-muscle MYosin                                        | -1.9281 | 1.9308583  | 3.870542 |
| <b>frm-7</b>    | FERM domain (protein4.1-<br>ezrin-radixin-moesin) family | -1.948  | 1.43612189 | 3.387423 |
| <b>ZK1067.2</b> | Hypothetical protein                                     | -1.7975 | 2.70221298 | 4.502042 |
| <b>sdc-2</b>    | Sex determination and dosage<br>compensation defect      | -2.3976 | 1.38397022 | 3.791939 |
| <b>cdh-1</b>    | Cadherin family                                          | -2.2095 | 1.35398779 | 3.555707 |
| <b>pac-1</b>    | GTPase-activating protein pac-<br>1                      | -1.6951 | 1.69278003 | 3.387361 |
| <b>T14G8.3</b>  | Hypothetical protein                                     | -1.7968 | 1.44469094 | 3.2421   |
| <b>F23A7.4</b>  | Hypothetical protein                                     | 1.70614 | -1.6435264 | -3.35695 |
| <b>rbc-1</b>    | RaBConnectin related                                     | -1.6963 | 2.42568544 | 4.115034 |
| <b>F23A7.8</b>  | Hypothetical protein                                     | 1.66968 | -1.7933502 | -3.47808 |
| <b>ssl-1</b>    | Helicase ssl-1                                           | -1.5232 | 1.87215076 | 3.395817 |
| <b>alg-1</b>    | Protein argonaute                                        | -1.6977 | 1.31247101 | 3.013352 |
| <b>F21C10.7</b> | Hypothetical protein                                     | -2.5393 | 2.74997688 | 5.285695 |
| <b>atg-2</b>    | AuTophaGy (yeast Atg                                     | -1.787  | 1.98557854 | 3.764355 |

---

|                  |                                                                 |         |            |          |
|------------------|-----------------------------------------------------------------|---------|------------|----------|
|                  | homolog)                                                        |         |            |          |
| <b>ver-3</b>     | Tyrosine-protein kinase<br>receptor ver-3                       | -1.8524 | 1.38484489 | 3.234826 |
| <b>tag-241</b>   | Protein TAG-241                                                 | -3.01   | 1.74121517 | 4.757289 |
| <b>R11A8.7</b>   | Ankyrin repeat and KH<br>domain-containing protein<br>R11A8.7   | -1.8588 | 2.34571646 | 4.206637 |
| <b>ntl-4</b>     | NOT-Like (yeast CCR4/NOT<br>complex component)                  | -1.6354 | 1.51800757 | 3.146868 |
| <b>dhc-1</b>     | Dynein heavy chain                                              | -1.7004 | 2.52763746 | 4.23865  |
| <b>K09A9.6</b>   | Hypothetical protein                                            | -1.8921 | 1.29903648 | 3.188371 |
| <b>C04H5.7</b>   | Hypothetical protein                                            | 1.50333 | -1.8317188 | -3.33594 |
| <b>Y53F4B.13</b> | Cap-specific mRNA<br>(nucleoside-2'-O-)-<br>methyltransferase 1 | -1.7179 | 1.57346638 | 3.292449 |
| <b>zfh-2</b>     | Zinc finger and homeobox                                        | -1.5985 | 1.28373286 | 2.872112 |
| <b>spp-12</b>    | Saposin-like protein family                                     | -2.4136 | -6.0058327 | -3.66101 |

---



### Supplementary Table 3. Genes enriched in biological process

terms

| <b>Term</b>                                      | <b>Background number</b> | <b>Gene Names</b>                                                           |
|--------------------------------------------------|--------------------------|-----------------------------------------------------------------------------|
| <b>movement of cell or subcellular component</b> | 242                      | mig-38;lrp-2;lam-1;gon-1;let-765;ced-5; lam-2;cbp-1;ten-1;Y105E8A.25;unc-70 |
| <b>cell migration</b>                            | 212                      | mig-38;lrp-2;lam-1;gon-1;let-765;ced-5; lam-2;cbp-1;ten-1;Y105E8A.25        |
| <b>cell motility</b>                             | 212                      | mig-38;lrp-2;lam-1;gon-1;let-765;ced-5; lam-2;cbp-1;ten-1;Y105E8A.25        |
| <b>localization of cell</b>                      | 212                      | mig-38;lrp-2;lam-1;gon-1;let-765;ced-5; lam-2;cbp-1;ten-1;Y105E8A.25        |
| <b>dendrite development</b>                      | 35                       | Y47G6A.29;lin-59;dnc-1;unc-70                                               |
| <b>neuron recognition</b>                        | 69                       | lpd-3;Y47G6A.29;lin-59;ten-1;unc-70                                         |
| <b>cell recognition</b>                          | 69                       | lpd-3;Y47G6A.29;lin-59;ten-1;unc-70                                         |
| <b>axonal fasciculation</b>                      | 69                       | lpd-3;Y47G6A.29;lin-59;ten-1;unc-70                                         |
| <b>response to nutrient levels</b>               | 8                        | fasn-1;unc-70                                                               |
| <b>response to starvation</b>                    | 8                        | fasn-1;unc-70                                                               |
| <b>response to extracellular stimulus</b>        | 8                        | fasn-1;unc-70                                                               |
| <b>neuron projection development</b>             | 114                      | lin-59;Y47G6A.29;dnc-1;lpd-3;ten-1;unc-70                                   |
| <b>cell projection organization</b>              | 114                      | lin-59;Y47G6A.29;dnc-1;lpd-3;ten-1;unc-70                                   |
| <b>neurogenesis</b>                              | 117                      | lin-59;Y47G6A.29;dnc-1;lpd-3;ten-1;unc-70                                   |
| <b>neuron development</b>                        | 117                      | lin-59;Y47G6A.29;dnc-1;lpd-3;ten-1;unc-70                                   |

---

|                                                           |     |                                             |
|-----------------------------------------------------------|-----|---------------------------------------------|
| <b>neuron differentiation</b>                             | 117 | lin-59;Y47G6A.29;dnc-1;lpd-3;ten-1;unc-70   |
| <b>nervous system development</b>                         | 117 | lin-59;Y47G6A.29;dnc-1;lpd-3;ten-1;unc-70   |
| <b>generation of neurons</b>                              | 117 | lin-59;Y47G6A.29;dnc-1;lpd-3;ten-1;unc-70   |
| <b>lipid metabolic process</b>                            | 31  | lpd-3;fasn-1;let-363                        |
| <b>inductive cell migration</b>                           | 129 | mig-38;let-765;ced-5;cbp-1;gon-1;Y105E8A.25 |
| <b>single-organism metabolic process</b>                  | 35  | lpd-3;fasn-1;let-363                        |
| <b>positive regulation of post-embryonic development</b>  | 35  | sdc-2;din-1;dpy-22                          |
| <b>positive regulation of vulval development</b>          | 35  | sdc-2;din-1;dpy-22                          |
| <b>positive regulation of nematode larval development</b> | 35  | sdc-2;din-1;dpy-22                          |
| <b>response to heat</b>                                   | 14  | daf-2;let-363                               |
| <b>response to temperature stimulus</b>                   | 14  | daf-2;let-363                               |
| <b>axon development</b>                                   | 101 | lpd-3;Y47G6A.29;lin-59;ten-1;unc-70         |
| <b>dauer larval development</b>                           | 16  | daf-2;let-363                               |
| <b>entry into diapause</b>                                | 16  | daf-2;let-363                               |
| <b>dormancy process</b>                                   | 16  | daf-2;let-363                               |
| <b>dauer entry</b>                                        | 16  | daf-2;let-363                               |
| <b>establishment of</b>                                   | 44  | dhc-1;mel-28;dnc-1                          |

---

---

|                                              |      |                                                                                                           |
|----------------------------------------------|------|-----------------------------------------------------------------------------------------------------------|
| <b>organelle localization</b>                |      |                                                                                                           |
| <b>pronuclear migration</b>                  | 44   | dhc-1;mel-28;dnc-1                                                                                        |
| <b>establishment of nucleus localization</b> | 44   | dhc-1;mel-28;dnc-1                                                                                        |
| <b>nucleus localization</b>                  | 44   | dhc-1;mel-28;dnc-1                                                                                        |
| <b>single fertilization</b>                  | 44   | dhc-1;mel-28;dnc-1                                                                                        |
| <b>organelle localization</b>                | 44   | dhc-1;mel-28;dnc-1                                                                                        |
| <b>nuclear migration</b>                     | 44   | dhc-1;mel-28;dnc-1                                                                                        |
| <b>cell differentiation</b>                  | 509  | pqn-85;cbp-1;sma-1;lin-59;ebax-1;dhc-1;<br>Y105E8A.24;alg-1;dnc-1;mup-4;lpd-3;Y47G6A.29; ten-1;unc-70     |
| <b>cell development</b>                      | 509  | pqn-85;cbp-1;sma-1;lin-59;ebax-1;dhc-1;<br>Y105E8A.24;alg-1;dnc-1;mup-4;lpd-3;Y47G6A.29; ten-1;unc-70     |
| <b>fertilization</b>                         | 46   | dhc-1;mel-28;dnc-1                                                                                        |
| <b>cellular developmental process</b>        | 513  | pqn-85;cbp-1;sma-1;lin-59;ebax-1;dhc-1;<br>Y105E8A.24;alg-1;dnc-1;mup-4;lpd-3;Y47G6A.29;<br>ten-1;unc-70  |
| <b>response to external stimulus</b>         | 53   | fasn-1;ten-1;unc-70                                                                                       |
| <b>response to abiotic stimulus</b>          | 24   | daf-2;let-363                                                                                             |
| <b>locomotion</b>                            | 1414 | sma-1;rig-4;met-1;lam-1;epg-5;ten-1;let-765;sdc-2;lrp-2;lam-2;gon-1;pqn-85;nmy-1;alg-1;C56E6.9;dcr-1;cdh- |

---

---

|                                                         |      |                                                                                                                                                                         |
|---------------------------------------------------------|------|-------------------------------------------------------------------------------------------------------------------------------------------------------------------------|
|                                                         |      | 1;ced-5;daf-2;ssl-1;taf-1;cbp-1;Y105E8A.25;mig-38;lin-59;mup-4;lin-49;dpy-22;mel-28;unc-70                                                                              |
| <b>centrosomal and pronuclear rotation</b>              | 5    | dhc-1                                                                                                                                                                   |
| <b>cellular component morphogenesis</b>                 | 191  | sma-1;ebax-1;pqn-85;mup-4;ten-1;unc-70                                                                                                                                  |
| <b>system development</b>                               | 1073 | smg-1;dcr-1;lpd-3;Y47G6A.29;ten-1;let-765;<br>sdc-2;ebax-1;gon-1;alg-1;fli-1;let-716;let-363;ssl-1;taf-1;Y105E8A.25;let-418;lin-59;dnc-1;let-19;<br>din-1;dpy-22;unc-70 |
| <b>taxis</b>                                            | 38   | ten-1;unc-70                                                                                                                                                            |
| <b>axon guidance</b>                                    | 38   | ten-1;unc-70                                                                                                                                                            |
| <b>chemotaxis</b>                                       | 38   | ten-1;unc-70                                                                                                                                                            |
| <b>neuron projection guidance</b>                       | 38   | ten-1;unc-70                                                                                                                                                            |
| <b>single-organism organelle organization</b>           | 260  | sma-1;ebax-1;dhc-1;rig-4;pqn-85;dnc-1;mup-4                                                                                                                             |
| <b>cuticle development</b>                              | 80   | nmy-1;sma-1;taf-1                                                                                                                                                       |
| <b>collagen and cuticulin-based cuticle development</b> | 80   | nmy-1;sma-1;taf-1                                                                                                                                                       |
| <b>oocyte development</b>                               | 9    | dhc-1                                                                                                                                                                   |
| <b>oocyte differentiation</b>                           | 9    | dhc-1                                                                                                                                                                   |
| <b>reproductive process</b>                             | 1233 | sma-1;smg-1;dcr-1;ten-1;let-765;sdc-2;gon-1;ebax-1;dhc-1;alg-1;fli-1;let-716;Y105E8A.24;daf-2;let-363;ssl-1;taf-                                                        |

---

---

|                                 |      |                                                                                                                |
|---------------------------------|------|----------------------------------------------------------------------------------------------------------------|
|                                 |      | 1;cbp-1;Y105E8A.25;let-418;lin-59;wnk-1;dnc-1;dpy-22;mel-28                                                    |
| <b>single-organism</b>          | 1068 | smg-1;dcr-1;ten-1;let-765;sdc-2;gon-                                                                           |
| <b>reproductive process</b>     |      | 1;ebax-1;dhc-1;alg-1;fli-1;let-716;Y105E8A.24;daf-2;let-363;ssl-1;taf-1;cbp-1;Y105E8A.25;let-418;dnc-1;dpy-22; |
|                                 |      | mel-28                                                                                                         |
| <b>cell part morphogenesis</b>  | 46   | ten-1;unc-70                                                                                                   |
| <b>cell projection</b>          | 46   | ten-1;unc-70                                                                                                   |
| <b>morphogenesis</b>            |      |                                                                                                                |
| <b>neuron projection</b>        | 46   | ten-1;unc-70                                                                                                   |
| <b>morphogenesis</b>            |      |                                                                                                                |
| <b>cell morphogenesis</b>       | 46   | ten-1;unc-70                                                                                                   |
| <b>involved in</b>              |      |                                                                                                                |
| <b>differentiation</b>          |      |                                                                                                                |
| <b>cell morphogenesis</b>       | 46   | ten-1;unc-70                                                                                                   |
| <b>involved in neuron</b>       |      |                                                                                                                |
| <b>differentiation</b>          |      |                                                                                                                |
| <b>cell morphogenesis</b>       | 46   | ten-1;unc-70                                                                                                   |
| <b>axonogenesis</b>             | 46   | ten-1;unc-70                                                                                                   |
| <b>mitotic nuclear division</b> | 47   | dnc-1;rig-4                                                                                                    |
| <b>multi-organism</b>           | 659  | let-716;cbp-1;sma-1;lin-59;dpy-22;wnk-                                                                         |
| <b>reproductive process</b>     |      | 1;alg-1;dnc-1;daf-2;dcr-1;dhc-1;Y105E8A.24;ten-1;mel-28                                                        |
| <b>defecation</b>               | 12   | ten-1                                                                                                          |
| <b>excretion</b>                | 12   | ten-1                                                                                                          |
| <b>cellular process</b>         | 1445 | pqn-85;sma-1;rig-4;fasn-1;met-1;lpd-3;lam-1;Y47G6A.29;gon-1;let-765;lrp-                                       |

---

---

|                                                                 |      |                                                                                                                                                                                          |
|-----------------------------------------------------------------|------|------------------------------------------------------------------------------------------------------------------------------------------------------------------------------------------|
|                                                                 |      | 2;lam-2;ebax-1;dhc-1;alg-1;ten-1;Y105E8A.24;ced-5;mup-4;let-363;cbp-1;                                                                                                                   |
|                                                                 |      | Y105E8A.25;mig-38;lin-59;dnc-1;dcr-1;mel-28;unc-70                                                                                                                                       |
| <b>response to stimulus</b>                                     | 237  | fasn-1;daf-2;let-363;dcr-1;ten-1;unc-70                                                                                                                                                  |
| <b>multi-organism process</b>                                   | 664  | let-716;cbp-1;sma-1;lin-59;dpy-22;wnk-1;alg-1;dnc-1;daf-2;dcr-1;dhc-1;Y105E8A.24;ten-1;mel-28                                                                                            |
| <b>response to stress</b>                                       | 189  | fasn-1;daf-2;let-363;dcr-1;unc-70                                                                                                                                                        |
| <b>single-organism cellular process</b>                         | 1409 | pqn-85;sma-1;rig-4;fasn-1;dcr-1;lpd-3;lam-1;Y47G6A.29;gon-1;let-765;lrp-2;lam-2;ebax-1;dhc-1;alg-1;ten-1;Y105E8A.24;ced-5;mup-4;cbp-1;Y105E8A.25;mig-38;lin-59;dnc-1;met-1;mel-28;unc-70 |
| <b>organelle assembly</b>                                       | 145  | ebax-1;pqn-85;mup-4;sma-1                                                                                                                                                                |
| <b>anatomical structure formation involved in morphogenesis</b> | 145  | ebax-1;pqn-85;mup-4;sma-1                                                                                                                                                                |
| <b>myosin filament assembly</b>                                 | 145  | ebax-1;pqn-85;mup-4;sma-1                                                                                                                                                                |
| <b>cellular component assembly involved in morphogenesis</b>    | 145  | ebax-1;pqn-85;mup-4;sma-1                                                                                                                                                                |
| <b>striated muscle cell differentiation</b>                     | 145  | ebax-1;pqn-85;mup-4;sma-1                                                                                                                                                                |
| <b>muscle structure development</b>                             | 145  | ebax-1;pqn-85;mup-4;sma-1                                                                                                                                                                |

---

---

|                                |     |                                                                                                |
|--------------------------------|-----|------------------------------------------------------------------------------------------------|
| <b>actomyosin structure</b>    | 145 | ebax-1;pqn-85;mup-4;sma-1                                                                      |
| <b>organization</b>            |     |                                                                                                |
| <b>myosin filament</b>         | 145 | ebax-1;pqn-85;mup-4;sma-1                                                                      |
| <b>organization</b>            |     |                                                                                                |
| <b>striated muscle myosin</b>  | 145 | ebax-1;pqn-85;mup-4;sma-1                                                                      |
| <b>thick filament assembly</b> |     |                                                                                                |
| <b>myofibril assembly</b>      | 145 | ebax-1;pqn-85;mup-4;sma-1                                                                      |
| <b>actin cytoskeleton</b>      | 145 | ebax-1;pqn-85;mup-4;sma-1                                                                      |
| <b>organization</b>            |     |                                                                                                |
| <b>actin filament-based</b>    | 145 | ebax-1;pqn-85;mup-4;sma-1                                                                      |
| <b>process</b>                 |     |                                                                                                |
| <b>striated muscle cell</b>    | 145 | ebax-1;pqn-85;mup-4;sma-1                                                                      |
| <b>development</b>             |     |                                                                                                |
| <b>muscle cell development</b> | 145 | ebax-1;pqn-85;mup-4;sma-1                                                                      |
| <b>muscle cell</b>             | 145 | ebax-1;pqn-85;mup-4;sma-1                                                                      |
| <b>differentiation</b>         |     |                                                                                                |
| <b>sexual reproduction</b>     | 404 | let-716;cbp-1;dhc-1;Y105E8A.24;dnc-1;daf-2;alg-1;ten-1;mel-28                                  |
| <b>cellular component</b>      | 680 | pqn-85;sma-1;lin-59;ebax-1;dhc-1;rig-4;Y47G6A.29;ced-5;dnc-1;mup-4;dcr-1;lpd-3;ten-1;unc-70    |
| <b>organization or</b>         |     |                                                                                                |
| <b>biogenesis</b>              |     |                                                                                                |
| <b>cellular component</b>      | 680 | pqn-85;sma-1;lin-59;ebax-1;dhc-1;rig-4;Y47G6A.29;ced-5;dnc-1;mup-4;dcr-1;lpd-3;ten-1;unc-70    |
| <b>organization</b>            |     |                                                                                                |
| <b>response to chemical</b>    | 54  | ten-1;unc-70                                                                                   |
| <b>translation</b>             | 15  | let-363                                                                                        |
| <b>anatomical structure</b>    | 747 | sdc-2;sma-1;ebax-1;nmy-1;dpy-22;lam-2;pqn-85;mup-4;sdc-3;taf-1;let-19;lam-1;din-1;ten-1;unc-70 |
| <b>morphogenesis</b>           |     |                                                                                                |

---

---

|                                                       |     |                                                                                                                                       |
|-------------------------------------------------------|-----|---------------------------------------------------------------------------------------------------------------------------------------|
| <b>development of primary sexual characteristics</b>  | 809 | sdc-2;let-716;ebax-1;ten-1;fli-1;let-765;dpy-22;alg-1;let-363;ssl-1;taf-1;dcr-1;smg-1;gon-1;Y105E8A.25;let-418                        |
| <b>gonad development</b>                              | 809 | sdc-2;let-716;ebax-1;ten-1;fli-1;let-765;dpy-22;alg-1;let-363;ssl-1;taf-1;dcr-1;smg-1;gon-1;Y105E8A.25;let-418                        |
| <b>reproductive system development</b>                | 809 | sdc-2;let-716;ebax-1;ten-1;fli-1;let-765;dpy-22;alg-1;let-363;ssl-1;taf-1;dcr-1;smg-1;gon-1;Y105E8A.25;let-418                        |
| <b>sex differentiation</b>                            | 809 | sdc-2;let-716;ebax-1;ten-1;fli-1;let-765;dpy-22;alg-1;let-363;ssl-1;taf-1;dcr-1;smg-1;gon-1;Y105E8A.25;let-418                        |
| <b>reproductive structure development</b>             | 809 | sdc-2;let-716;ebax-1;ten-1;fli-1;let-765;dpy-22;alg-1;let-363;ssl-1;taf-1;dcr-1;smg-1;gon-1;Y105E8A.25;let-418                        |
| <b>cellular localization</b>                          | 154 | lrp-2;dnc-1;mel-28;dhc-1                                                                                                              |
| <b>establishment of localization in cell</b>          | 154 | lrp-2;dnc-1;mel-28;dhc-1                                                                                                              |
| <b>developmental process involved in reproduction</b> | 990 | sdc-2;let-716;cbp-1;taf-1;ebax-1;ten-1;Y105E8A.24;fli-1;let-765;dpy-22;alg-1;let-363;ssl-1;dhc-1;dcr-1;smg-1;gon-1;Y105E8A.25;let-418 |
| <b>mitotic cell cycle process</b>                     | 109 | dhc-1;rig-4;dnc-1                                                                                                                     |
| <b>protein complex assembly</b>                       | 160 | ebax-1;pqn-85;mup-4;sma-1                                                                                                             |
| <b>protein complex biogenesis</b>                     | 160 | ebax-1;pqn-85;mup-4;sma-1                                                                                                             |
| <b>cellular component</b>                             | 160 | ebax-1;pqn-85;mup-4;sma-1                                                                                                             |

---



---

|                                 |     |                                                                                                                             |
|---------------------------------|-----|-----------------------------------------------------------------------------------------------------------------------------|
| <b>assembly</b>                 |     |                                                                                                                             |
| <b>cellular component</b>       | 160 | ebax-1;pqn-85;mup-4;sma-1                                                                                                   |
| <b>biogenesis</b>               |     |                                                                                                                             |
| <b>macromolecular</b>           | 160 | ebax-1;pqn-85;mup-4;sma-1                                                                                                   |
| <b>complex assembly</b>         |     |                                                                                                                             |
| <b>cellular macromolecular</b>  | 160 | ebax-1;pqn-85;mup-4;sma-1                                                                                                   |
| <b>complex assembly</b>         |     |                                                                                                                             |
| <b>cellular protein complex</b> | 160 | ebax-1;pqn-85;mup-4;sma-1                                                                                                   |
| <b>assembly</b>                 |     |                                                                                                                             |
| <b>body morphogenesis</b>       | 600 | sdc-2;sma-1;pqn-85;nmy-1;dpy-22;lam-2;sdc-3;taf-1;let-19;lam-1;din-1;ten-1                                                  |
| <b>ovulation</b>                | 20  | ten-1                                                                                                                       |
| <b>organ development</b>        | 956 | sdc-2;let-716;din-1;ebax-1;ten-1;fli-1;let-765;dpy-22;alg-1;let-363;ssl-1;taf-1;let-19;dcr-1;smg-1;gon-1;Y105E8A.25;let-418 |
| <b>macromolecular</b>           | 226 | ebax-1;dhc-1;mup-4;sma-1;pqn-85                                                                                             |
| <b>complex subunit</b>          |     |                                                                                                                             |
| <b>organization</b>             |     |                                                                                                                             |
| <b>protein complex subunit</b>  | 226 | ebax-1;dhc-1;mup-4;sma-1;pqn-85                                                                                             |
| <b>organization</b>             |     |                                                                                                                             |
| <b>cytoskeleton</b>             | 226 | ebax-1;dhc-1;mup-4;sma-1;pqn-85                                                                                             |
| <b>organization</b>             |     |                                                                                                                             |
| <b>oviposition</b>              | 282 | let-716;sma-1;wnk-1;lin-59;dcr-1;dpy-22                                                                                     |
| <b>multicellular organism</b>   | 624 | let-716;cbp-1;sma-1;lin-59;dpy-22;wnk-1;alg-1;daf-2;dcr-1;dhc-1;Y105E8A.24;ten-1                                            |
| <b>reproduction</b>             |     |                                                                                                                             |
| <b>multicellular organismal</b> | 624 | let-716;cbp-1;sma-1;lin-59;dpy-22;wnk-                                                                                      |

---

---

|                                                                |     |                                               |
|----------------------------------------------------------------|-----|-----------------------------------------------|
| <b>reproductive process</b>                                    |     | 1;alg-1;daf-2;dcr-1;dhc-1;Y105E8A.24;ten-1    |
| <b>phagocytosis</b>                                            | 71  | ced-5;Y47G6A.29                               |
| <b>membrane organization</b>                                   | 71  | ced-5;Y47G6A.29                               |
| <b>apoptotic cell clearance</b>                                | 71  | ced-5;Y47G6A.29                               |
| <b>engulfment of apoptotic cell</b>                            | 71  | ced-5;Y47G6A.29                               |
| <b>phagocytosis, engulfment</b>                                | 71  | ced-5;Y47G6A.29                               |
| <b>membrane invagination</b>                                   | 71  | ced-5;Y47G6A.29                               |
| <b>multicellular organismal reproductive behaviour</b>         | 291 | let-716;sma-1;wnk-1;lin-59;dcr-1;dpy-22       |
| <b>multi-multicellular organism process</b>                    | 291 | let-716;sma-1;wnk-1;lin-59;dcr-1;dpy-22       |
| <b>multi-organism reproductive behaviour</b>                   | 291 | let-716;sma-1;wnk-1;lin-59;dcr-1;dpy-22       |
| <b>reproductive behaviour</b>                                  | 291 | let-716;sma-1;wnk-1;lin-59;dcr-1;dpy-22       |
| <b>positive regulation of developmental process</b>            | 348 | sdc-2;sma-1;alg-1;C32E12.4;sma-9;din-1;dpy-22 |
| <b>positive regulation of multicellular organismal process</b> | 348 | sdc-2;sma-1;alg-1;C32E12.4;sma-9;din-1;dpy-22 |
| <b>multi-organism behaviour</b>                                | 292 | let-716;sma-1;wnk-1;lin-59;dcr-1;dpy-22       |
| <b>negative regulation of vulval development</b>               | 185 | sdc-2;let-19;din-1;dpy-22                     |
| <b>negative regulation of nematode larval</b>                  | 185 | sdc-2;let-19;din-1;dpy-22                     |

---

---

|                                                                |     |                                                  |
|----------------------------------------------------------------|-----|--------------------------------------------------|
| <b>development</b>                                             |     |                                                  |
| <b>negative regulation of post-embryonic development</b>       | 185 | sdc-2;let-19;din-1;dpy-22                        |
| <b>negative regulation of developmental process</b>            | 185 | sdc-2;let-19;din-1;dpy-22                        |
| <b>negative regulation of multicellular organismal process</b> | 187 | sdc-2;let-19;din-1;dpy-22                        |
| <b>gamete generation</b>                                       | 358 | let-716;cbp-1;dhc-1;Y105E8A.24;daf-2;alg-1;ten-1 |
| <b>behaviour</b>                                               | 302 | let-716;sma-1;wnk-1;lin-59;dcr-1;dpy-22          |
| <b>system process</b>                                          | 28  | ten-1                                            |
| <b>primary metabolic process</b>                               | 191 | lpd-3;fasn-1;mup-4;let-363                       |
| <b>female gamete generation</b>                                | 194 | dhc-1;cbp-1;ten-1;Y105E8A.24                     |
| <b>mitotic cell cycle</b>                                      | 138 | dhc-1;rig-4;dnc-1                                |
| <b>moulting cycle</b>                                          | 253 | let-19;mup-4;cbp-1;dpy-22;alg-1                  |
| <b>moulting cycle, collagen and cuticulin-based cuticle</b>    | 253 | let-19;mup-4;cbp-1;dpy-22;alg-1                  |
| <b>cellular protein metabolic process</b>                      | 30  | let-363                                          |
| <b>regulation of multicellular organismal development</b>      | 200 | sdc-2;let-19;din-1;dpy-22                        |
| <b>regulation of nematode</b>                                  | 200 | sdc-2;let-19;din-1;dpy-22                        |

---

---

|                                                    |     |                                                                                    |
|----------------------------------------------------|-----|------------------------------------------------------------------------------------|
| <b>larval development</b>                          |     |                                                                                    |
| <b>regulation of vulval development</b>            | 200 | sdc-2;let-19;din-1;dpy-22                                                          |
| <b>regulation of post-embryonic development</b>    | 200 | sdc-2;let-19;din-1;dpy-22                                                          |
| <b>growth</b>                                      | 439 | atg-2;sma-1;alg-1;C32E12.4;let-363;sma-9;epg-5;dpy-22                              |
| <b>macromolecule biosynthetic process</b>          | 34  | let-363                                                                            |
| <b>cellular biosynthetic process</b>               | 34  | let-363                                                                            |
| <b>organic substance biosynthetic process</b>      | 34  | let-363                                                                            |
| <b>cellular macromolecule biosynthetic process</b> | 34  | let-363                                                                            |
| <b>positive regulation of biological process</b>   | 394 | sdc-2;sma-1;alg-1;C32E12.4;sma-9;din-1;dpy-22                                      |
| <b>hermaphrodite genitalia development</b>         | 732 | sdc-2;ebax-1;dpy-22;let-765;smg-1;dcr-1;ssl-1;taf-1;alg-1;gon-1;Y105E8A.25;let-418 |
| <b>genitalia development</b>                       | 732 | sdc-2;ebax-1;dpy-22;let-765;smg-1;dcr-1;ssl-1;taf-1;alg-1;gon-1;Y105E8A.25;let-418 |
| <b>vulval development</b>                          | 236 | sdc-2;let-19;din-1;dpy-22                                                          |
| <b>post-embryonic organ development</b>            | 236 | sdc-2;let-19;din-1;dpy-22                                                          |
| <b>oogenesis</b>                                   | 175 | dhc-1;cbp-1;Y105E8A.24                                                             |

---

---

|                                 |     |                                        |
|---------------------------------|-----|----------------------------------------|
| <b>single-organism</b>          | 176 | ced-5;lrp-2;Y47G6A.29                  |
| <b>transport</b>                |     |                                        |
| <b>single-organism</b>          | 176 | ced-5;lrp-2;Y47G6A.29                  |
| <b>localization</b>             |     |                                        |
| <b>negative regulation of</b>   | 304 | sdc-2;let-19;din-1;dpy-22;dcr-1        |
| <b>biological process</b>       |     |                                        |
| <b>regulation of</b>            | 498 | sdc-2;sma-1;alg-1;C32E12.4;let-19;sma- |
| <b>developmental process</b>    |     | 9;                                     |
|                                 |     | din-1;dpy-22                           |
| <b>regulation of</b>            | 500 | sdc-2;sma-1;alg-1;C32E12.4;let-19;sma- |
| <b>multicellular organismal</b> |     | 9;                                     |
| <b>process</b>                  |     | din-1;dpy-22                           |
| <b>organic substance</b>        | 309 | lpd-3;fasn-1;mup-4;let-363;dcr-1       |
| <b>metabolic process</b>        |     |                                        |
| <b>cellular macromolecule</b>   | 51  | let-363                                |
| <b>metabolic process</b>        |     |                                        |
| <b>cytokinesis</b>              | 52  | dhc-1                                  |
| <b>metabolic process</b>        | 317 | lpd-3;fasn-1;mup-4;let-363;dcr-1       |
| <b>positive regulation of</b>   | 319 | C32E12.4;sma-1;sma-9;dpy-22;alg-1      |
| <b>growth</b>                   |     |                                        |
| <b>regulation of</b>            | 319 | C32E12.4;sma-1;sma-9;dpy-22;alg-1      |
| <b>multicellular organism</b>   |     |                                        |
| <b>growth</b>                   |     |                                        |
| <b>multicellular organism</b>   | 319 | C32E12.4;sma-1;sma-9;dpy-22;alg-1      |
| <b>growth</b>                   |     |                                        |
| <b>positive regulation of</b>   | 319 | C32E12.4;sma-1;sma-9;dpy-22;alg-1      |
| <b>multicellular organism</b>   |     |                                        |
| <b>growth</b>                   |     |                                        |
| <b>positive regulation of</b>   | 319 | C32E12.4;sma-1;sma-9;dpy-22;alg-1      |

---

---

|                                  |      |                                                                            |
|----------------------------------|------|----------------------------------------------------------------------------|
| <b>developmental growth</b>      |      |                                                                            |
| <b>regulation of</b>             | 319  | C32E12.4;sma-1;sma-9;dpy-22;alg-1                                          |
| <b>developmental growth</b>      |      |                                                                            |
| <b>regulation of growth</b>      | 319  | C32E12.4;sma-1;sma-9;dpy-22;alg-1                                          |
| <b>organelle organization</b>    | 515  | sma-1;ebax-1;dhc-1;rig-4;pqn-85;dnc-1;mup-4;dcr-1                          |
| <b>cellular process involved</b> | 259  | dhc-1;Y105E8A.24;cbp-1;alg-1                                               |
| <b>in reproduction in</b>        |      |                                                                            |
| <b>multicellular organism</b>    |      |                                                                            |
| <b>germ cell development</b>     | 259  | dhc-1;Y105E8A.24;cbp-1;alg-1                                               |
| <b>developmental growth</b>      | 328  | C32E12.4;sma-1;sma-9;dpy-22;alg-1                                          |
| <b>cellular metabolic</b>        | 61   | let-363                                                                    |
| <b>process</b>                   |      |                                                                            |
| <b>ageing</b>                    | 732  | sdc-2;lin-59;daf-2;fasn-1;spp-12;met-1;hgap-2;let-363;cbp-1;let-765;unc-70 |
| <b>determination of adult</b>    | 732  | sdc-2;lin-59;daf-2;fasn-1;spp-12;met-1;hgap-2;                             |
| <b>lifespan</b>                  |      | let-363;cbp-1;let-765;unc-70                                               |
| <b>multicellular organismal</b>  | 732  | sdc-2;lin-59;daf-2;fasn-1;spp-12;met-1;hgap-2;let-363;cbp-1;let-765;unc-70 |
| <b>aging</b>                     |      |                                                                            |
| <b>nuclear division</b>          | 277  | dhc-1;dcr-1;rig-4;dnc-1                                                    |
| <b>organelle fission</b>         | 277  | dhc-1;dcr-1;rig-4;dnc-1                                                    |
| <b>protein metabolic</b>         | 142  | mup-4;let-363                                                              |
| <b>process</b>                   |      |                                                                            |
| <b>spindle organization</b>      | 72   | dhc-1                                                                      |
| <b>mitotic spindle</b>           | 72   | dhc-1                                                                      |
| <b>organization</b>              |      |                                                                            |
| <b>reproduction</b>              | 2353 | plc-1;sma-1;fasn-1;met-1;lam-1;ten-1;let-765;sdc-2;Y53F4B.13;lam-2;gon-    |

---

---

|                                                  |      |                                                                                                                                                                                              |
|--------------------------------------------------|------|----------------------------------------------------------------------------------------------------------------------------------------------------------------------------------------------|
|                                                  |      | 1;ebax-1;nmy-1;alg-1;gtl-<br>1;C25H3.8;dcr-1;let-<br>716;Y105E8A.24;daf-2;let-363;ssl-1;taf-<br>1;cbp-1;Y105E8A.25;let-418;lin-<br>59;wnk-1;mup-4;dnc-1;dhc-1;lin-49;din-<br>1;dpy-22;mel-28 |
| <b>gene expression</b>                           | 153  | dcr-1;let-363                                                                                                                                                                                |
| <b>regulation of biological<br/>process</b>      | 713  | sdc-2;sma-1;dhc-1;alg-1;C32E12.4;dcr-<br>1;let-19;sma-9;din-1;dpy-22                                                                                                                         |
| <b>apoptotic process</b>                         | 442  | fasn-1;mup-4;met-1;dcr-1;cbp-<br>1;Y105E8A.25                                                                                                                                                |
| <b>programmed cell death</b>                     | 442  | fasn-1;mup-4;met-1;dcr-1;cbp-<br>1;Y105E8A.25                                                                                                                                                |
| <b>microtubule cytoskeleton<br/>organization</b> | 81   | dhc-1                                                                                                                                                                                        |
| <b>microtubule-based<br/>process</b>             | 81   | dhc-1                                                                                                                                                                                        |
| <b>regulation of meiosis</b>                     | 86   | dhc-1                                                                                                                                                                                        |
| <b>regulation of cell<br/>proliferation</b>      | 86   | dhc-1                                                                                                                                                                                        |
| <b>cell proliferation</b>                        | 86   | dhc-1                                                                                                                                                                                        |
| <b>localization</b>                              | 1423 | mig-38;lrp-2;lam-1;lin-59;gon-1;dnc-<br>1;let-765;daf-2;Y47G6A.29;ced-5;fasn-<br>1;mup-4;taf-1;dhc-1;lpd-3;lam-2;cbp-<br>1;ten-1;Y105E8A.25;mel-28                                           |
| <b>regulation of cell division</b>               | 90   | dhc-1                                                                                                                                                                                        |
| <b>regulation of nuclear<br/>division</b>        | 90   | dhc-1                                                                                                                                                                                        |
| <b>regulation of cell cycle</b>                  | 90   | dhc-1                                                                                                                                                                                        |

---

---

|                                                               |     |                                                                                |
|---------------------------------------------------------------|-----|--------------------------------------------------------------------------------|
| <b>process</b>                                                |     |                                                                                |
| <b>regulation of cellular component organization</b>          | 90  | dhc-1                                                                          |
| <b>regulation of organelle organization</b>                   | 90  | dhc-1                                                                          |
| <b>cell division</b>                                          | 175 | dhc-1;mel-28                                                                   |
| <b>establishment of localization</b>                          | 837 | mig-38;lrp-2;lin-59;dhc-1;Y47G6A.29;ced-5;<br>dnc-1;mup-4;taf-1;let-765;mel-28 |
| <b>death</b>                                                  | 484 | fasn-1;mup-4;met-1;dcr-1;cbp-1;Y105E8A.25                                      |
| <b>cell death</b>                                             | 484 | fasn-1;mup-4;met-1;dcr-1;cbp-1;Y105E8A.25                                      |
| <b>cell cycle process</b>                                     | 350 | dhc-1;dcr-1;rig-4;dnc-1                                                        |
| <b>meiotic cell cycle process</b>                             | 105 | dcr-1                                                                          |
| <b>meiotic chromosome segregation</b>                         | 105 | dcr-1                                                                          |
| <b>secretion by cell</b>                                      | 107 | lrp-2                                                                          |
| <b>secretion</b>                                              | 107 | lrp-2                                                                          |
| <b>gene silencing</b>                                         | 109 | dcr-1                                                                          |
| <b>negative regulation of macromolecule metabolic process</b> | 109 | dcr-1                                                                          |
| <b>regulation of gene expression, epigenetic</b>              | 109 | dcr-1                                                                          |
| <b>posttranscriptional gene silencing</b>                     | 109 | dcr-1                                                                          |
| <b>chromosome segregation</b>                                 | 109 | dcr-1                                                                          |
| <b>negative regulation of</b>                                 | 109 | dcr-1                                                                          |

---



---

|                                                          |     |                         |
|----------------------------------------------------------|-----|-------------------------|
| <b>metabolic process</b>                                 |     |                         |
| <b>negative regulation of gene expression</b>            | 109 | dcr-1                   |
| <b>posttranscriptional regulation of gene expression</b> | 109 | dcr-1                   |
| <b>posttranscriptional gene silencing by RNA</b>         | 109 | dcr-1                   |
| <b>gene silencing by RNA</b>                             | 109 | dcr-1                   |
| <b>RNA interference</b>                                  | 109 | dcr-1                   |
| <b>macromolecule</b>                                     | 281 | dcr-1;mup-4;let-363     |
| <b>metabolic process</b>                                 |     |                         |
| <b>regulation of meiotic cell cycle</b>                  | 111 | dhc-1                   |
| <b>macromolecule catabolic process</b>                   | 116 | mup-4                   |
| <b>regulation of cell cycle</b>                          | 116 | dhc-1                   |
| <b>protein catabolic process</b>                         | 116 | mup-4                   |
| <b>organic substance</b>                                 | 116 | mup-4                   |
| <b>catabolic process</b>                                 |     |                         |
| <b>cell cycle</b>                                        | 384 | dhc-1;dcr-1;rig-4;dnc-1 |
| <b>regulation of metabolic process</b>                   | 125 | dcr-1                   |
| <b>regulation of gene expression</b>                     | 125 | dcr-1                   |
| <b>regulation of macromolecule</b>                       | 125 | dcr-1                   |
| <b>metabolic process</b>                                 |     |                         |
| <b>catabolic process</b>                                 | 126 | mup-4                   |

---

---

|                                         |      |                                                                                                                                                               |
|-----------------------------------------|------|---------------------------------------------------------------------------------------------------------------------------------------------------------------|
| <b>biological regulation</b>            | 1212 | sdc-2;cbp-1;sma-1;fasn-1;dhc-1;alg-1;C32E12.4;lpd-3;daf-2;dcr-1;let-19;sma-9;din-1;dpy-22;let-765                                                             |
| <b>defence response</b>                 | 133  | dcr-1                                                                                                                                                         |
| <b>meiotic nuclear division</b>         | 242  | dhc-1;dcr-1                                                                                                                                                   |
| <b>regulation of cellular process</b>   | 144  | dhc-1                                                                                                                                                         |
| <b>larval development</b>               | 1929 | lam-1;fasn-1;dcr-1;lpd-3;let-765;sdc-2;lam-2;nmy-1;alg-1;gtl-1;C56E6.9;cdh-1;let-716;daf-2;let-363;ssl-1;taf-1;let-418;lin-59;mup-4;dhc-1;let-19;din-1;dpy-22 |
| <b>nematode larval development</b>      | 1929 | lam-1;fasn-1;dcr-1;lpd-3;let-765;sdc-2;lam-2;nmy-1;alg-1;gtl-1;C56E6.9;cdh-1;let-716;daf-2;let-363;ssl-1;taf-1;let-418;lin-59;mup-4;dhc-1;let-19;din-1;dpy-22 |
| <b>post-embryonic development</b>       | 1930 | lam-1;fasn-1;dcr-1;lpd-3;let-765;sdc-2;lam-2;nmy-1;alg-1;gtl-1;C56E6.9;cdh-1;let-716;daf-2;let-363;ssl-1;taf-1;let-418;lin-59;mup-4;dhc-1;let-19;din-1;dpy-22 |
| <b>meiotic cell cycle</b>               | 262  | dhc-1;dcr-1                                                                                                                                                   |
| <b>lipid localization</b>               | 547  | lpd-3;fasn-1;daf-2;cbp-1;let-765                                                                                                                              |
| <b>maintenance of location</b>          | 547  | lpd-3;fasn-1;daf-2;cbp-1;let-765                                                                                                                              |
| <b>lipid storage</b>                    | 547  | lpd-3;fasn-1;daf-2;cbp-1;let-765                                                                                                                              |
| <b>regulation of biological quality</b> | 552  | lpd-3;fasn-1;daf-2;cbp-1;let-765                                                                                                                              |
| <b>transport</b>                        | 801  | mig-38;lrp-2;lin-59;Y47G6A.29;ced-                                                                                                                            |

---

---

|                                 |      |                                                                                                                                                                                                                                                                 |
|---------------------------------|------|-----------------------------------------------------------------------------------------------------------------------------------------------------------------------------------------------------------------------------------------------------------------|
|                                 |      | 5;mup-4;taf-1;let-765                                                                                                                                                                                                                                           |
| <b>macromolecule</b>            | 567  | lpd-3;fasn-1;daf-2;cbp-1;let-765                                                                                                                                                                                                                                |
| <b>localization</b>             |      |                                                                                                                                                                                                                                                                 |
| <b>vesicle-mediated</b>         | 753  | mig-38;lin-59;Y47G6A.29;ced-5;mup-4;taf-1;let-765                                                                                                                                                                                                               |
| <b>transport</b>                |      |                                                                                                                                                                                                                                                                 |
| <b>endocytosis</b>              | 753  | mig-38;lin-59;Y47G6A.29;ced-5;mup-4;taf-1;let-765                                                                                                                                                                                                               |
| <b>receptor-mediated</b>        | 699  | mig-38;taf-1;mup-4;let-765;lin-59                                                                                                                                                                                                                               |
| <b>endocytosis</b>              |      |                                                                                                                                                                                                                                                                 |
| <b>multicellular organismal</b> | 4086 | pqn-85;sma-9;let-765;rig-4;smg-1;fasn-1;met-1;lpd-3;sma-1;Y47G6A.29;ten-1;F54B3.1;sdc-2;lam-2;gon-1;ebax-1;nmy-1;alg-1;gtl-1;lam-1;C56E6.9;daf-2;                                                                                                               |
| <b>process</b>                  |      | cdh-1;let-716;Y105E8A.24;C32E12.4;hgap-2;mup-4;let-363;ssl-1;taf-1;cbp-1;Y105E8A.25;let-418;mig-38;lin-59;fli-1;wnk-1;spp-12;dnc-1;dhc-1;let-19;dcr-1;din-1;dpy-22;mel-28;unc-70                                                                                |
| <b>anatomical structure</b>     | 3507 | pqn-85;sma-1;let-765;rig-4;smg-1;fasn-1;dcr-1;lpd-3;lam-1;alg-1;ten-1;F54B3.1;sdc-2;lam-2;gon-1;ebax-1;nmy-1;Y47G6A.29;C56E6.9;fli-1;let-716;Y105E8A.24;mup-4;let-363;ssl-1;taf-1;cbp-1;Y105E8A.25;let-418;mig-38;lin-59;dnc-1;sdc-3;dhc-1;let-19;din-1;dpy-22; |
| <b>development</b>              |      | mel-28;unc-70                                                                                                                                                                                                                                                   |

---

---

|                                                  |      |                                                                                                                                                                                                                                                                                                                                   |
|--------------------------------------------------|------|-----------------------------------------------------------------------------------------------------------------------------------------------------------------------------------------------------------------------------------------------------------------------------------------------------------------------------------|
| <b>single-multicellular<br/>organism process</b> | 3992 | sma-9;let-765;rig-4;smg-1;fasn-1;met-1;lpd-3;sma-1;Y47G6A.29;ten-1;F54B3.1;sdc-2;lam-2;gon-1;ebax-1;nmy-1;alg-1;gtl-1;lam-1;C56E6.9;daf-2;cdh-1;let-716;pqn-85;C32E12.4;hgap-2;mup-4;let-363;ssl-1;taf-1;cbp-1;Y105E8A.25;let-418;mig-38;lin-59;fli-1;spp-12;<br>dnc-1;dhc-1;let-19;dcr-1;din-1;dpy-22;mel-28;unc-70              |
| <b>single-organism<br/>developmental process</b> | 4141 | pqn-85;sma-9;let-765;rig-4;smg-1;fasn-1;met-1;lpd-3;sma-1;Y47G6A.29;ten-1;F54B3.1;sdc-2;lam-2;gon-1;ebax-1;nmy-1;alg-1;gtl-1;lam-1;C56E6.9;daf-2;cdh-1;let-716;Y105E8A.24;C32E12.4;hgap-2;mup-4;let-363;ssl-1;taf-1;cbp-1;Y105E8A.25;let-418;mig-38;lin-59;fli-1;spp-12;dnc-1;sdc-3;dhc-1;let-19;dcr-1;din-1;dpy-22;mel-28;unc-70 |
| <b>developmental process</b>                     | 4145 | pqn-85;sma-9;let-765;rig-4;smg-1;fasn-1;met-1;lpd-3;sma-1;Y47G6A.29;ten-1;F54B3.1;sdc-2;lam-2;gon-1;ebax-1;nmy-1;alg-1;gtl-1;lam-1;C56E6.9;daf-2;cdh-1;let-716;Y105E8A.24;C32E12.4;hgap-2;mup-4;let-363;ssl-1;taf-1;cbp-1;Y105E8A.25;let-418;mig-38;lin-59;fli-1;spp-12;dnc-1;sdc-3;dhc-1;let-                                    |

---

---

|                                                           |      |                                                                                                                                                                                                                                                                                                                                                                                               |
|-----------------------------------------------------------|------|-----------------------------------------------------------------------------------------------------------------------------------------------------------------------------------------------------------------------------------------------------------------------------------------------------------------------------------------------------------------------------------------------|
| <b>multicellular organismal development</b>               | 3894 | 19; dcr-1; din-1; dpy-22; mel-28; unc-70<br>sma-1; let-765; rig-4; smg-1; fasn-1; met-1; lpd-3; lam-1; alg-1; ten-1; F54B3.1; sdc-2; lam-2; gon-1; ebax-1; nmy-1; Y47G6A.29; gtl-1; C56E6.9; daf-2; cdh-1; let-716; pqn-85; hgap-2; mup-4; let-363; ssl-1; taf-1; cbp-1; Y105E8A.25; let-418; mig-38; lin-59; fli-1; spp-12; dnc-1; dhc-1; let-19; dcr-1; din-1; dpy-22; mel-28; unc-70       |
| <b>single-organism process</b>                            | 4370 | pqn-85; sma-9; let-765; rig-4; smg-1; fasn-1; met-1; lpd-3; sma-1; Y47G6A.29; ten-1; F54B3.1; sdc-2; lrp-2; lam-2; gon-1; ebax-1; nmy-1; alg-1; gtl-1; lam-1; C56E6.9; daf-2; cdh-1; let-716; Y105E8A.24; C32E12.4; hgap-2; mup-4; let-363; ssl-1; taf-1; cbp-1; Y105E8A.25; let-418; mig-38; ced-5; lin-59; fli-1; spp-12; dnc-1; sdc-3; dhc-1; let-19; dcr-1; din-1; dpy-22; mel-28; unc-70 |
| <b>embryo development ending in birth or egg hatching</b> | 2897 | lam-1; rig-4; fasn-1; gon-1; let-765; F54B3.1; sdc-2; lam-2; pqn-85; nmy-1; alg-1; C56E6.9; let-716; ten-1; let-363; ssl-1; taf-1; cbp-1; Y105E8A.25; let-418; mig-38; dnc-1; dhc-1; let-19; din-1; dpy-22; mel-28                                                                                                                                                                            |
| <b>embryo development</b>                                 | 2901 | lam-1; rig-4; fasn-1; gon-1; let-765; F54B3.1; sdc-2; lam-2; pqn-85; nmy-                                                                                                                                                                                                                                                                                                                     |

---

---

1;alg-1;C56E6.9;let-716;ten-1;let-  
363;ssl-1;taf-1;cbp-1;Y105E8A.25;let-  
418;mig-38;dnc-1;dhc-1;let-19;din-  
1;dpy-22;mel-28

---
